# Supplementary material
Source: publisher figshare collection journal article supplement (https://gsapubs.figshare.com/ndownloader/files/22276794)
Supplement: Supplementary file 1 [file 22276794]

## Sheet: CPA & CIA
Height (m)	Age (Ma)	CPA	CIA
1713	23.345	90.72	68.23
1712	23.3504	87.09	65.4
1708	23.3768	89.59	67.35
1643	23.766	86.57	65
1625	23.8754	90.55	68.34
1603	23.9958	79.1	57.69
1602	24	78.62	56.64
1565	24.185	81.09	59.42
1562	24.1989	80.17	57.78
1548	24.2723	82.9	60.75
1542	24.3039	80.4	58.5
1539	24.3182	79.59	57.9
1532	24.3518	78.8	56.96
1524	24.3898	82.45	60.72
1517	24.4263	79.37	57.36
1508	24.474	92.36	69.66
1467	24.6397	94.17	70.82
1467	24.6397	94.17	70.91
1449	24.7102	79.33	57.58
1447	24.7166	81	59.16
1412	24.9096	78.94	56.92
1378	25.111	90.63	67.79
1336	25.2973	81.73	59.64
1321	25.3639	77.57	55.94
1306	25.4322	80.61	58.76
1278	25.5563	79.48	57.88
1263	25.6203	79.25	57.38
1246	25.6989	89.81	65.66
1175	26.0214	78.84	56.78
1103	26.42	80.89	59.04
1062	26.7292	78.37	56.68
1045	26.8563	80.76	59.33
1017	27.06	79.16	57.11
1006	27.1415	77.16	55.34
956	27.5228	76.99	55.05
929	27.7446	81.28	59.41
887	28.0169	79.3	57.33
867	28.1197	78.31	56.23
857	28.1606	78.9	56.96
823	28.3099	78.56	56.73
797	28.4354	84.02	59.96
787	28.4819	81.36	57.67
772	28.5585	83.51	59.77
760	28.6157	85.31	61.6
751	28.6583	80.84	57.25
739	28.7177	81.06	57.18
726	28.7771	81.54	57.85
711	28.8516	81.59	58.01
696	28.9219	82.87	58.97
687	28.9685	78.62	55.13
687	28.9701	79.16	55.74
683	28.9888	78.33	55.11
680	29.0018	80.37	57.19
676	29.0185	80.29	56.71
658	29.1058	79	55.54
598	29.3768	79.78	57.89
585	29.4362	79.8	56.45
530	29.7892	79.63	57.76
461	30.351	78.84	55.94
194	36.0111	87.81	64.37
179	36.2623	86.11	62.73
171	36.3934	89.25	65.12
121	36.4165	90.33	66.25
54	37.1158	89.21	65.42
37	37.2049	94	68.92
8	37.3572	93.72	67.05
2	37.3887	90.32	66.42
1	37.3932	91.58	67.94
-64	Eocene	92.25	66.62
-86	Eocene	88.92	64.06
-97	Eocene	86.67	62.5
